# Supplementary material for: A new nomogram for predicting extraurothelial recurrence in patients with upper urinary tract urothelial carcinoma following radical nephroureterectomy
Source: Front Oncol. 2024 Nov 6;14:1442168. doi: 10.3389/fonc.2024.1442168 (PMC11576284; doi:10.3389/fonc.2024.1442168)
Supplement: Supplementary file 1 [file Table1.docx]

Table S1 Variance inflation factor between variables.

| Variables | VIF |
| --- | --- |
| | T | | --- | | 1.242 |
| | N | | --- | | 1.110 |
| | Hematuria | | --- | | 1.025 |
| | Grade | | --- | | 1.237 |
| | Invasion | | --- | | 1.198 |
| | NI | | --- | | 1.192 |
| | HB | | --- | | 1.061 |
| | NLR | | --- | | 1.018 |

VIF: Variance inflation factor.
